# Supplementary material for: Coordination chemistry for antibacterial materials: a monolayer of a Cu2+ 2,2′-bipyridine complex grafted on a glass surface
Source: Royal Society of Chemistry journal article supplement (doi:10.1039/c2dt32607h), 2012-12-21
Supplement: c2dt32607h.pdf [file c2dt32607h.pdf]

## Coordination chemistry for antibacterial materials: a monolayer of a $\text{Cu}^{2+}$ 2,2'-bipyridine complex grafted on a glass surface

Piersandro Pallavicini, Giacomo Dacarro, Pietro Grisoli, Carlo Mangano, Maddalena Patrini, Luigi Sangaletti and Angelo Taglietti

### Electronic Supplementary Informations

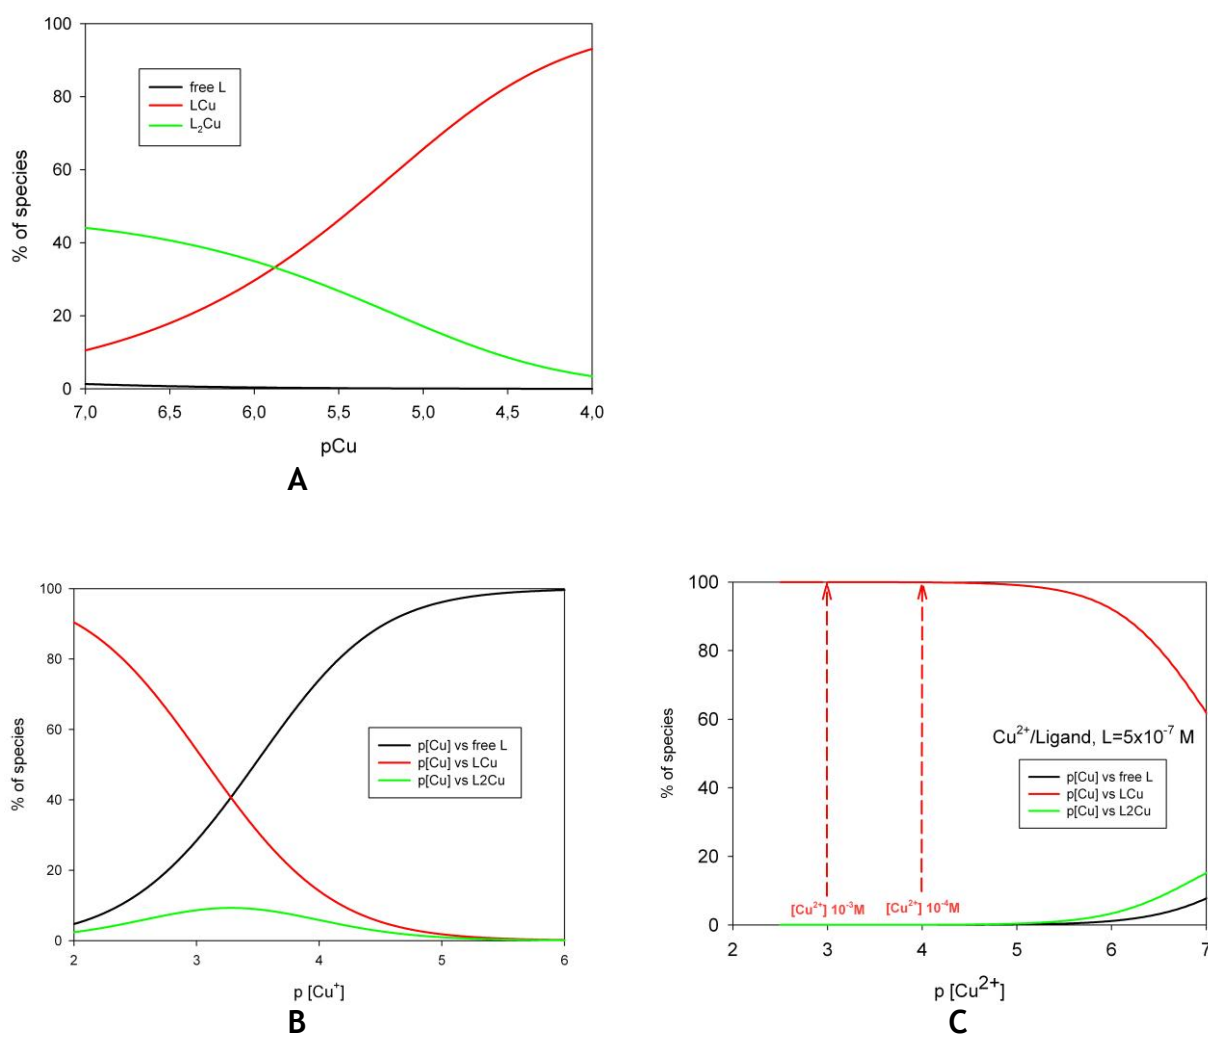

**Figure S1** - A) distribution diagram for  $\text{bipy-PR}/\text{Cu}^{2+}$  in acetonitrile solution, calculated for  $\text{bipy-PR} = 2.5 \times 10^{-5} \text{ M}$ ; B) distribution diagram for  $\text{bipy-PR}/\text{Cu}^+$  in acetonitrile solution for  $\text{bipy-PR} = 5 \times 10^{-5} \text{ M}$ ; C) distribution diagram for  $\text{bipy-PR}/\text{Cu}^{2+}$  in acetonitrile solution, calculated for  $\text{bipy-PR} = 5 \times 10^{-7} \text{ M}$  (% of  $[\text{LCu}]^{2+}$  for  $\text{Cu}^{2+}$  concentrations =  $10^{-3}$  and  $10^{-4} \text{ M}$  are evidenced by red dotted arrows)

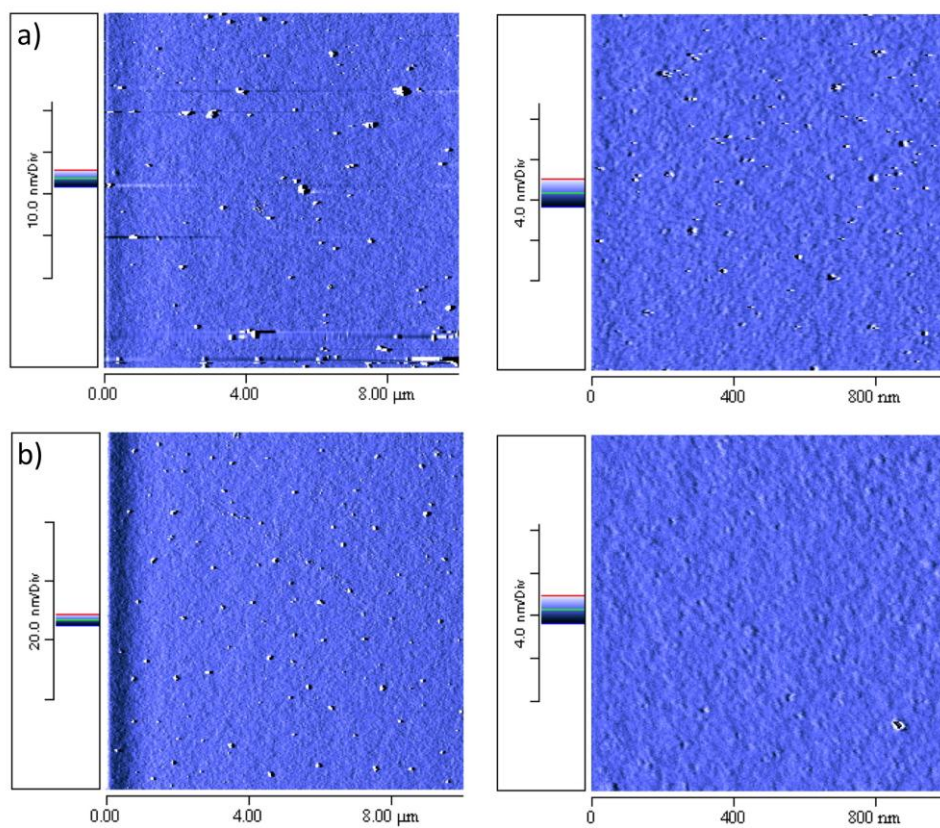

**FigureS2.** AFM images (error signal) of: a) Glass|bipy surface on a 10 micron scale (left panel) and 1 micron scale (right panel); b) the same for Glass|(bipy)Cu<sup>2+</sup> surface

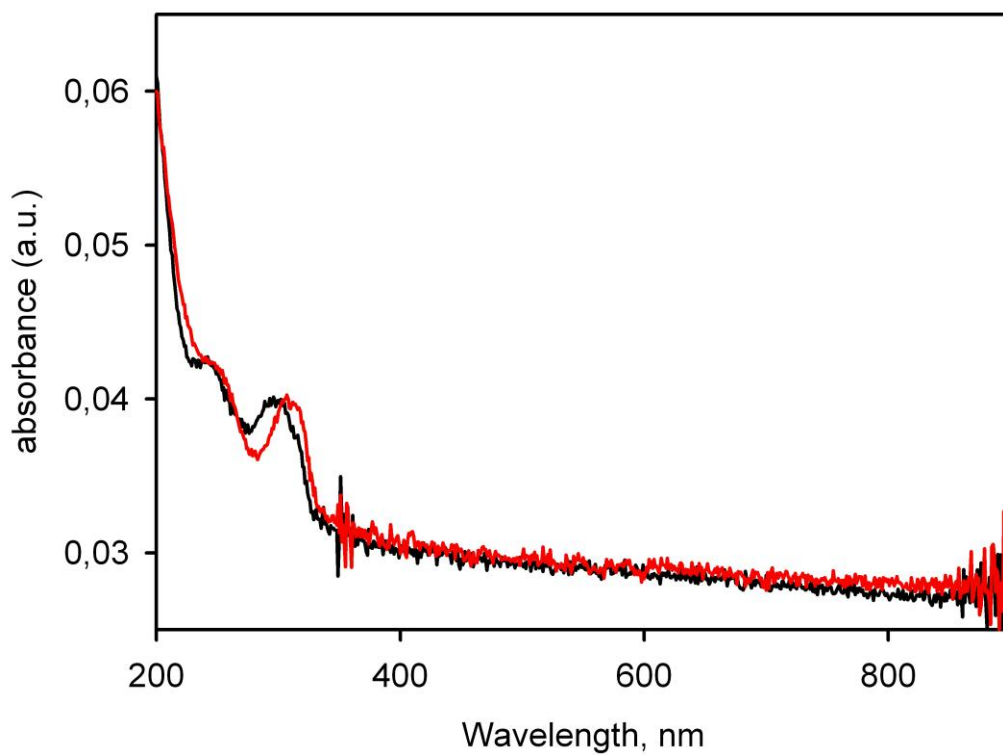

**Figure S3.** Uncorrected spectra for Glass|bipy (black spectrum) and Glass|(bipy)Cu<sup>2+</sup> (the slide is actually made of quartz, not glass). The two spectra were recorded on the same slide, before and after complexation

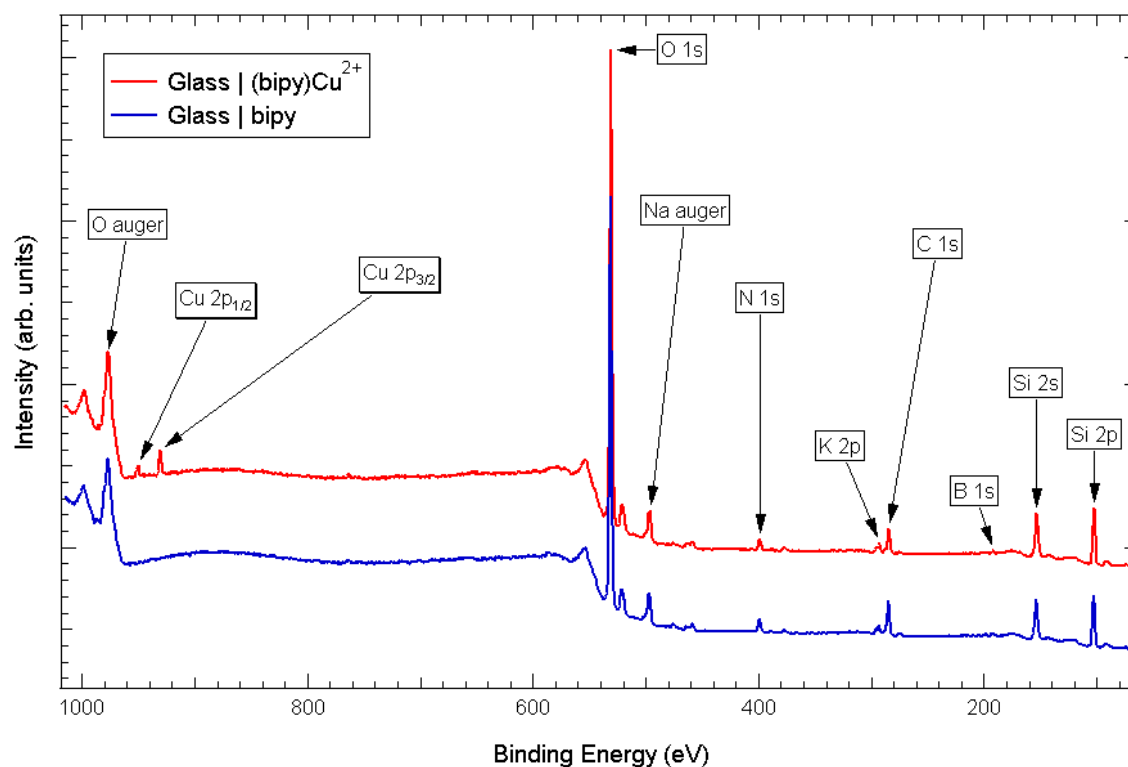

**Figure S4.** full range XPS spectra: red line Glass|(bipy)Cu<sup>2+</sup>; blue line Glass|bipy. The XPS data have been collected with the Al  $k_{\alpha}$  line ( $h\nu=1486.6$  eV, resolution 1.00 eV) of a non-monochromatized dual-anode x-ray source and a SCIENTA R3000 electron analyzer, with a pass energy set at 100 eV
